# Supplementary material for: Emerging Plasma Technology That Alleviates Crop Stress During the Early Growth Stages of Plants: A Review
Source: PubMed Central journal article supplement (PMC7373780; doi:10.3389/fpls.2020.00988), 2020-07-15
Supplement: DataSheet_1.pdf [file DataSheet_1.pdf]

**Supplementary Table 1.** The additional factors for the plasma treatments in the same literature presented in Table 1.

| Plasma                       | Treatment condition         |                            |                                 | Reference                 |
|------------------------------|-----------------------------|----------------------------|---------------------------------|---------------------------|
|                              | Frequency (Hz) <sup>a</sup> | Pressure (Pa) <sup>b</sup> | Gas flow (L min <sup>-1</sup> ) |                           |
| Radiofrequency discharge     | 10 M                        | 6.7×10 <sup>-4</sup>       | -                               | Bormashenko et al. (2012) |
|                              | 13.56 M                     | 66.65                      | -                               | Filatova et al. (2013)    |
|                              | 5.28 M                      | 40–80                      | -                               | Filatova et al. (2014)    |
|                              | 13.56 M                     | 20                         | -                               | Sadhu et al. (2017)       |
|                              | 10 M                        | 6.7×10 <sup>-4</sup>       | -                               | Bormashenko et al. (2015) |
|                              | 13.56 M                     | 150                        | -                               | Li et al. (2014)          |
|                              | 13.56 M                     | 150                        | -                               | Li et al. (2015)          |
|                              | 13.56 M                     | 9–40                       | -                               | Volin et al. (2000)       |
|                              | 13.56 M                     | 9–40                       | -                               | Volin et al. (2000)       |
|                              | 13.56 M                     | 9–40                       | -                               | Volin et al. (2000)       |
|                              | 13.56 M                     | 9–40                       | -                               | Volin et al. (2000)       |
| Dielectric barrier discharge | 50                          | AP                         | 1.0                             | Dobrin et al. (2015)      |
|                              | 50                          | AP                         | 1.5                             | Li et al. (2017)          |
|                              | 14 k                        | AP                         | -                               | Stolárik et al. (2015)    |
|                              | 30                          | AP                         | 3.0                             | Park et al. (2018)        |
|                              | 22 k                        | AP                         | 1.5                             | Ji et al. (2016)          |
| Corona discharge             | 700                         | AP                         | 2.5                             | Khamsen et al. (2016)     |
| Arc discharge                | -                           | 10–20                      | -                               | Shao et al. (2013)        |
| Glow discharge               | DC                          | 800                        | -                               | Chen et al. (2016)        |
|                              | 3–5 k                       | 1333                       | -                               | Roy et al. (2018)         |
| Microwave discharge          | 2.45 G                      | 140                        | 2.5                             | Šerá et al. (2010)        |
|                              | 3 G                         | 150                        | -                               | Jiang et al. (2014a)      |

<sup>a</sup> Frequency, where k is kilo; M is mega, and G is giga.

<sup>b</sup> Pressure, where AP is atmospheric pressure.

**Supplementary Table 2.** The additional factors for the plasma treatments in the same literature presented in Table 2.

| Plasma                       | Treatment condition         |                            |                                 | Reference                |
|------------------------------|-----------------------------|----------------------------|---------------------------------|--------------------------|
|                              | Frequency (Hz) <sup>a</sup> | Pressure (Pa) <sup>b</sup> | Gas flow (L min <sup>-1</sup> ) |                          |
| Radiofrequency discharge     | 5.28 M                      | 40–80                      | -                               | Filatova et al. (2014)   |
|                              | 13.56 M                     | 150                        | -                               | Jiang et al. (2014b)     |
| Dielectric barrier discharge | 22 k                        | AP                         | -                               | Jo et al. (2014)         |
|                              | 500                         | AP                         | -                               | Ambrico et al. (2017)    |
|                              | 14 k                        | AP                         | -                               | Zahoranová et al. (2016) |
|                              | 1 k                         | 0.1–0.5                    | -                               | Selcuk et al. (2008)     |
| Arc discharge                | 12                          | liquid                     | -                               | Kang et al. (2015)       |

<sup>a</sup> Frequency, where k is kilo, and M is mega.

<sup>b</sup> Pressure, where AP is atmospheric pressure.

**Supplementary Table 3.** The additional factors for the plasma treatments in the same literature presented in Table 3.

| Plasma                       | Treatment condition         |                            |                                 | Reference                |
|------------------------------|-----------------------------|----------------------------|---------------------------------|--------------------------|
|                              | Frequency (Hz) <sup>a</sup> | Pressure (Pa) <sup>b</sup> | Gas flow (L min <sup>-1</sup> ) |                          |
| Radiofrequency discharge     | 13.56 M                     | 150                        | -                               | Jiang et al. (2014b)     |
|                              | 13.56 M                     | 150                        | -                               | Li et al. (2015)         |
| Dielectric barrier discharge | 50                          | AP                         | 1.5                             | Li et al. (2017)         |
|                              | 50                          | AP                         | -                               | Guo et al. (2017)        |
|                              | -                           | AP                         | -                               | Henselová et al. (2012)  |
|                              | 20                          | 100                        | -                               | Iranbakhsh et al. (2017) |
|                              | 60                          | AP                         | 2                               | Zhang et al. (2017)      |
|                              | 22 k                        | AP                         | 1.5                             | Ji et al. (2016)         |
|                              | 15 k                        | AP                         | 1                               | Ji et al. (2015)         |
|                              | 20                          | 100                        | -                               | Iranbakhsh et al. (2018) |
| Microwave discharge          | 2.45 G                      | 140                        | 0.2                             | Šerá et al. (2010)       |
| Glow discharge               | -                           | 800                        | -                               | Chen et al. (2016)       |
| Arc discharge                | -                           | AP                         | -                               | Yin et al. (2005)        |

<sup>a</sup> Frequency, where k is kilo; M is mega, and G is giga.

<sup>b</sup> Pressure, where AP is atmospheric pressure.

**Supplementary Table 4.** The additional factors for the plasma treatments in the same literature presented in Table 4.

| Plasma                       | Treatment condition         |               |                                 | Reference                |
|------------------------------|-----------------------------|---------------|---------------------------------|--------------------------|
|                              | Frequency (Hz) <sup>a</sup> | Pressure (Pa) | Gas flow (L min <sup>-1</sup> ) |                          |
| Radiofrequency discharge     | 13.56 M                     | 150           | -                               | Li et al. (2015)         |
|                              | 13.56 M                     | 150           | -                               | Jiang et al. (2014b)     |
|                              | -                           | -             | -                               | Feng et al. (2018)       |
| Dielectric barrier discharge | -                           | -             | 16                              | Ochi et al. (2017)       |
|                              | 20 k                        | 100           | -                               | Iranbakhsh et al. (2017) |
|                              | 50                          | -             | -                               | Guo et al. (2017)        |
|                              | -                           | -             | 100                             | Iranbakhsh et al. (2018) |
|                              | 3 k                         | -             | -                               | Bußler et al. (2015)     |

<sup>a</sup> Frequency, where k is kilo, and M is mega.
